# Supplementary material for: Digital Synesthesia in Heritage and Second Language Writing during Collaborative and Individual Digital Storytelling
Source: MDPI journal article supplement (doi:10.3390/languages7030222), 2022-08-22
Supplement: s1 [file s1]

Archive with 1 entries (1 files):
- languages-1189473-supplementary.pdf
